# Supplementary material
Source: PubMed Central journal article supplement (PMC4346166)

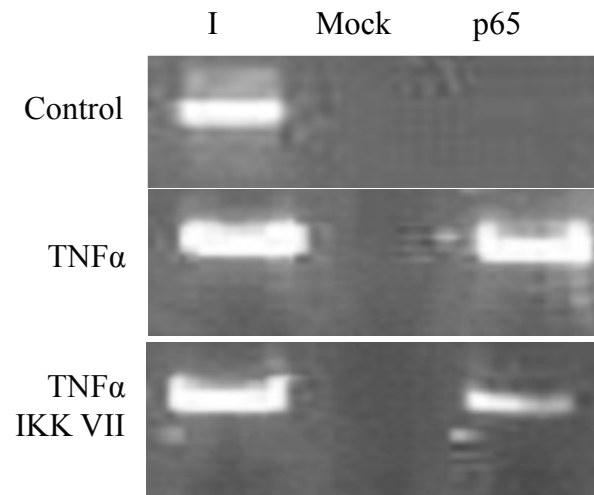

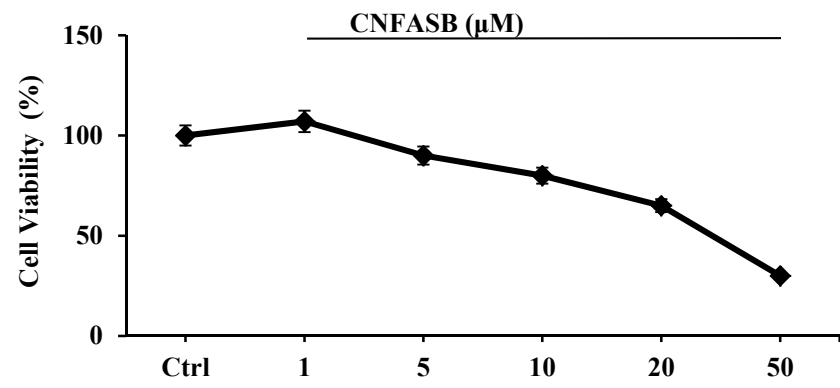

Supplement: NIHMS646371-supplement-Supplemental_Figures.pdf [file NIHMS646371-supplement-Supplemental_Figures.pdf]
